# 1 *Ex vivo* susceptibility to antimalarial drugs and polymorphisms 2 in drug resistance genes of African *Plasmodium falciparum*, 3 2016-2023: a genotype-phenotype association study

4 Jason Rosado<sup>1\*</sup>✉, Abebe A. Fola<sup>2,3</sup>✉, Sandrine Cojean<sup>4,5,6</sup>✉, Véronique Sarrasin<sup>4</sup>✉, Romain  
5 Coppée<sup>7</sup>, Rizwana Zaffaroulah<sup>4</sup>, Azza Bouzayene<sup>4</sup>, Liliane Cicéron<sup>4</sup>, Ludivine Houzé<sup>4</sup>, Rebecca  
6 Crudale<sup>2,3</sup>, Lise Musset<sup>8</sup>, Marc Thellier<sup>9</sup>, Bruno Pradines<sup>10,11,12,13</sup>, Jérôme Clain<sup>1\*</sup>¶, Jeffrey A.  
7 Bailey<sup>2,3</sup>¶, Sandrine Houzé<sup>1,4</sup>¶, Investigation Study Group<sup>Ψ</sup>

8 ✉: The first authors contributed equally to this work.

9 ¶: Co-senior authors contributed equally to this work.

## 10 Authors and affiliations

11 <sup>1</sup> Université Paris Cité, Institut de Recherche pour le Développement, MERIT, F-75006 Paris,  
12 France

13 <sup>2</sup> Department of Pathology and Laboratory Medicine, Brown University, RI, USA, 02906

14 <sup>3</sup> Center for Computational Molecular Biology, Brown University, RI, USA, 02906

15 <sup>4</sup> Centre National de Référence du Paludisme, Assistance Publique-Hôpitaux de Paris, Hôpital  
16 Bichat-Claude-Bernard, Paris, France

17 <sup>5</sup> Université Paris-Saclay, Faculté de Pharmacie, Orsay, France

18 <sup>6</sup> UMR BIPAR, Anses, Laboratoire de Santé Animale, INRAE, Ecole Nationale Vétérinaire  
19 d'Alfort, Maisons-Alfort, France

20 <sup>7</sup> Université de Rouen Normandie, Laboratoire de Parasitologie-Mycologie, UR 7510 ESCAPE,  
21 Rouen, France

22 <sup>8</sup> Laboratoire de Parasitologie, World Health Organization Collaborating Center for Surveillance  
23 of Antimalarial Drug Resistance, Centre Nationale de Référence du Paludisme, Institut Pasteur  
24 de la Guyane, Cayenne, French Guiana

25 <sup>9</sup> Centre National de Référence du Paludisme, Sorbonne Université, Assistance Publique des  
26 Hôpitaux de Paris, Laboratoire de Mycologie et Parasitologie, Hôpital de la Pitié-Salpêtrière,  
27 Paris, France

28 <sup>10</sup> Unité Parasitologie et Entomologie, Département des Maladies Infectieuses, Institut de  
29 Recherche Biomédicale des Armées, Marseille, France

30 <sup>11</sup> Aix Marseille Université, SSA, AP-HM, RITMES, Marseille, France

31 <sup>12</sup> Centre National de Référence du Paludisme, Marseille, France

32 <sup>13</sup> IHU-Méditerranée Infection, Marseille, France

33  
34 \*: Corresponding Authors: JR: [jjrosados@gmail.com](mailto:jjrosados@gmail.com); JC: [jerome.clain@u-paris.fr](mailto:jerome.clain@u-paris.fr)

35 Ψ: The members of the study group are listed in acknowledgements.

36  
37 **Keywords:** Antimalarial drug resistance, *ex-vivo* susceptibility, IC50 assay, genotype

## 38 Abstract

39 **Background:** Given the altered responses to both artemisinins and lumefantrine in Eastern Africa,  
40 monitoring antimalarial drug resistance in all African countries is paramount.

41 **Methods:** We measured the susceptibility to six antimalarials using *ex vivo* growth inhibition  
42 assays (IC<sub>50</sub>) for a total of 805 *Plasmodium falciparum* isolates obtained from travelers returning  
43 to France (2016-2023), mainly from West and Central Africa. Isolates were sequenced using  
44 molecular inversion probes (MIPs) targeting fourteen drug resistance genes across the parasite  
45 genome.

46 **Findings:** *Ex vivo* susceptibility to several drugs has significantly decreased in 2019-2023 versus  
47 2016-2018 parasite samples: lumefantrine (median IC<sub>50</sub>: 23·0 nM [IQR: 14·4-35·1] in 2019-2023  
48 versus 13·9 nM [8·42-21·7] in 2016-2018, p<0·0001), monodesethylamodiaquine (35·4 [21·2-  
49 51·1] versus 20·3 nM [15·4-33·1], p<0·0001), and marginally piperazine (20·5 [16·5-26·2]  
50 versus 18·0 [14·2-22·4] nM, p<0·0001). Only four isolates carried a validated *pfkelch13* mutation.  
51 Multiple mutations in *pfert* and one in *pfmdr1* (N86Y) were significantly associated with altered  
52 susceptibility to multiple drugs. The susceptibility to lumefantrine was altered by *pfert* and *pfmdr1*  
53 mutations in an additive manner, with the wild-type haplotype (*pfert* K76-*pfmdr1* N86) exhibiting  
54 the least susceptibility.

55 **Interpretation:** Our study on *P. falciparum* isolates from West and Central Africa indicates a low  
56 prevalence of molecular markers of artemisinin resistance but a significant decrease in  
57 susceptibility to the partner drugs that have been the most widely used since a decade -lumefantrine  
58 and amodiaquine. These phenotypic changes likely mark parasite adaptation to sustained drug  
59 pressure and call for intensifying the monitoring of antimalarial drug resistance in Africa.

60 **Funding:** This work was supported by the French Ministry of Health (grant to the French National  
61 Malaria Reference Center) and by the Agence Nationale de la Recherche (ANR-17-CE15-0013-  
62 03 to JC). JAB was supported by NIH R01AI139520. JR postdoctoral fellowship was funded by  
63 Institut de Recherche pour le Développement.

## 64 Research in context

### 65 Evidence before this study

66 Artemisinin-based combination therapies (ACTs) have been introduced since the 2000s as the  
67 first-line curative treatment of malaria. ACTs combine an artemisinin derivative, which rapidly  
68 reduces parasite load, with another antimalarial drug -known as partner drug- which eliminates the  
69 remaining parasites thanks to its longer half-life. This approach reduces the likelihood of parasites  
70 developing resistance to both drugs, thereby increasing treatment efficacy and delaying the  
71 emergence of resistance. However, resistance to artemisinins and then to some partner drugs was  
72 identified in Southeast Asia more than a decade ago and has spread throughout the region.  
73 Artemisinin partial resistance is now emerging in the East and Horn of Africa. It manifests as  
74 delayed parasite clearance from the bloodstream after treatment, increasing the parasite load in  
75 contact with the partner drug only and the likelihood of selecting resistant parasites. It is, therefore,  
76 important to monitor antimalarial drug susceptibility and drug resistance mutations in  
77 contemporary African isolates, especially in the understudied West and Central African regions,  
78 to anticipate the spread of multidrug-resistant parasites.

79 We searched for articles on antimalarial drug resistance published between January 1, 2000, and  
80 July 1, 2024, using the PubMed search terms “antimalarial resistance”, “Africa”, and “*ex vivo*”.  
81 Of the 69 published studies, only six encompassing a total of 827 isolates across five West and  
82 Central African countries from 2016 to 2022 combined *ex vivo* drug assays with genotyping data.  
83 Parasites with an increased rate of *ex vivo* survival to artemisinins were reported in one study from  
84 Ghana (7/90 isolates in 2018) and another from The Gambia (4/41 isolates in 2017). Only the  
85 Ghanaian study reported mutations in the non-propeller domain of *pfkelch13* gene, whereas the  
86 Gambian study reported mutations associated with reduced susceptibility to lumefantrine (7%,  
87 3/41). In Mali, Senegal and Burkina Faso, most isolates were susceptible to commonly used  
88 antimalarial drugs (chloroquine, amodiaquine, piperaquine, mefloquine, lumefantrine and  
89 dihydroartemisinin) using standard growth inhibition assays. In Ghana, reduced susceptibility to  
90 artemisinin, mefloquine and amodiaquine was observed. The relative lack of recent data on  
91 parasite susceptibility to antimalarial drugs in recent parasites from West and Central Africa  
92 prompted us to conduct this study.

93

## 94 **Added value of this study**

95 *Ex vivo* susceptibility to six antimalarial drugs (dihydroartemisinin, lumefantrine, mefloquine,  
96 chloroquine, monodesethylamodiaquine, and piperazine) and mutations in fourteen drug  
97 resistance genes were evaluated in 805 isolates collected between January 2016 and February 2023  
98 from 35 African countries, mainly from West and Central Africa.

99 Median IC<sub>50</sub> values were in the low nanomolar range, indicating good potency against *P.*  
100 *falciparum*. However, worrying trends emerged from 2019 onwards, with median IC<sub>50</sub> values for  
101 lumefantrine that increased from 13·9 nM in 2016-18 to 23 nM in 2019-23 and for amodiaquine  
102 from 20·3 nM to 35·4 nM.

103 The high prevalence of resistance alleles in *pfdhfr*, *pfdhps*, *pfmdr1* and *pfcr1* genes underscores the  
104 sustained pressure exerted by antimalarial drugs on parasite populations. Notably, although the  
105 triple mutant *pfdhfr* N51I-C59R-S108N was highly prevalent, the *dhfr-dhps* quintuple mutant  
106 (with extra *pfdhps* A437G-K540E), which is responsible for sulfadoxine-pyrimethamine treatment  
107 failure in adults and children, was rare. In addition, the analysis revealed some geographic and  
108 temporal variations in mutation prevalence.

109 The genotype-phenotype association analysis performed in this study elucidates the relationship  
110 between genetic variants and *ex vivo* drug susceptibility, providing valuable information for  
111 understanding the molecular basis of resistance and informing future treatment strategies. For  
112 example, mutations in the *pfcr1* and *pfmdr1* genes, mainly K76T and N86Y, were associated with  
113 altered susceptibilities to most drugs. Haplotypic association analysis further indicated that the two  
114 genes have cumulative effects on the susceptibility to lumefantrine, with the wild-type haplotype  
115 (*pfcr1* K76-*pfmdr1* N86) exhibiting the least susceptibility.

## 116 **Implication of all the available evidence**

117 While the susceptibility to most antimalarials suggests continued efficacy, the observed decrease  
118 in susceptibilities to lumefantrine and amodiaquine in parasites from West and Central Africa from  
119 2019 onwards suggests an ongoing adaptation of parasites, possibly related to the increasing use  
120 of ACT treatments in Sub-saharan Africa since a decade. These phenotypic changes over time  
121 were accompanied by small changes in the prevalence of resistance alleles in *pfcr1* and *pfmdr1*  
122 genes. Additional changes, potentially leading to larger decreases in drug susceptibilities, can be

123 expected over time. The large-scale analysis presented here provides invaluable, contemporary  
124 insights into the current landscape of susceptibility to antimalarial drugs and molecular markers of  
125 resistance in *P. falciparum* isolates from West and Central Africa. While the data suggests that  
126 ACTs and sulfadoxine-pyrimethamine are likely to be effective in these regions, the phenotypic  
127 changes we observed call for intensifying the monitoring of antimalarial drug resistance in Africa.

## 128 Introduction

129 Malaria continues to take a heavy toll on public health in Africa. Antimalarials remain a  
130 cornerstone in the fight against malaria, and the evolution of drug resistance poses a significant  
131 threat to the efficacy of treatment regimens.<sup>1,2</sup> Monitoring antimalarial drug resistance and  
132 treatment efficacy is paramount, as drug selection pressures are ongoing, and no alternatives to  
133 current first-line treatments will be available in the coming years.<sup>3,4</sup> Artemisinin-based  
134 combination therapies (ACTs) as first-line curative treatments that were introduced in the 2000s.  
135 ACTs combine an artemisinin derivative, which rapidly reduces parasite load, with another  
136 antimalarial drug -known as partner drug- which eliminates the remaining parasites thanks to its  
137 longer half-life.

138 However, the emergence of artemisinin partial resistance (ART-R) has raised concerns about the  
139 long-term efficacy of ACTs for effective malaria treatment.<sup>5,6</sup> After ART-R emerged, treatment  
140 failures with dihydroartemisinin (DHA)- piperazine (PPQ) were reported in Southeast Asia as  
141 parasites acquired additional resistance to PPQ.<sup>7,8</sup> ART-R has recently emerged in East Africa and  
142 the Horn of Africa,<sup>9-11</sup> creating the potential for selection of parasites resistant to the partner  
143 drug(s) and threatening the long-term efficacy of ACTs in Africa.<sup>12,13</sup> Worryingly, decreased  
144 susceptibility of *P. falciparum* isolates to the partner drug lumefantrine (LMF) has also been  
145 reported in northern Uganda.<sup>14,15</sup> In West and Central Africa, treatment efficacy studies have  
146 confirmed the clinical efficacy of ACTs in several settings overall.<sup>16,17</sup> However, few studies have  
147 reported *ex vivo* antimalarial drug assays for West and Central African isolates, with little evidence  
148 of reduced susceptibility to partner drugs.<sup>18,19</sup> Molecular surveillance has also revealed the  
149 sporadic presence of validated ART-R *pfkelch13* mutations in these two regions.<sup>20</sup>

150 To better understand the current situation in West and Central Africa, we analyzed the *ex vivo*  
151 susceptibility to six drugs (DHA, LMF, mefloquine (MFQ), chloroquine (CQ), mono-  
152 desethylamodiaquine (MDAQ), and PPQ; assessed by growth inhibition assays) of 805 *P.*  
153 *falciparum* isolates collected between 2016 and 2023 from imported malaria cases in returned  
154 travelers to mainly West and Central Africa. The isolates were also sequenced using high-  
155 throughput molecular inversion probes (MIPs) targeting 815 overlapping targets across fourteen  
156 drug resistance genes to determine the prevalence of drug resistance markers and to estimate  
157 genetic correlates of drug susceptibility phenotypes.

## 158 Methods

### 159 Sample and data collection

160 The French National Malaria Reference Center (FNMRC) coordinates a nationwide network of  
161 hospitals in mainland France to survey imported malaria. Blood samples from civilian or military  
162 hospitals participating in the FNRMC network were sent to the FNRMC reference laboratory  
163 (Bichat Hospital in Paris) (see Study Group). Inclusion criteria were: diagnosis of *P. falciparum*  
164 malaria recorded between January 2016 and February 2023 and confirmed by microscopy and  
165 PCR, available DNA sample, information on the country visited, and available IC<sub>50</sub> data against  
166 CQ, MFQ, PPQ, MDAQ, LMF and DHA. A total of 813 isolates fulfilled the inclusion criteria.

### 167 *Ex vivo* assays

168 CQ, DHA, MDAQ, MFQ, LMF, and PPQ were purchased from Alsachim (Illkirch Graffenstaden,  
169 France). The susceptibility of the isolates to the antimalarial drugs was assessed without culture  
170 adaptation. 100 µL of parasitized erythrocytes (final parasitaemia of 0.5% and a final hematocrit  
171 of 1.5%) were aliquoted into 96-well plates preloaded with a concentration gradient of antimalarial  
172 drugs. The plates were incubated for 48 hours in a controlled atmosphere of 85% N<sub>2</sub>, 10% O<sub>2</sub>, 5%  
173 CO<sub>2</sub> at 37°C. Drug susceptibilities were determined as half-maximal inhibitory concentrations  
174 (IC<sub>50</sub>s) using the standard 42-hour [<sup>3</sup>H]hypoxanthine uptake inhibition assay (**Supplementary**  
175 **Methods**)<sup>21</sup>. Resistance thresholds for the six compounds were previously reported by Pradines,  
176 Kaddouri and others.<sup>22-24</sup>

### 177 DNA extraction and MIP sequencing of drug resistance genes

178 Genomic DNA was extracted from 200 µL whole blood using a MagNA Pure automaton (Roche  
179 Diagnostics, USA), eluted in 100 µL, and stored at -20°C. DNA extracts from the included samples  
180 were sent to Brown University for MIP sequencing. All samples were then genotyped using  
181 molecular inversion probes (MIPs, n=815) targeting known drug resistance SNP mutations in 14  
182 genes across the *P. falciparum* genome, as previously described (**Table S1, Appendix 2**).<sup>12,25</sup>  
183 Sequencing was performed on an Illumina NextSeq 550 instrument (150 bp paired-end reads) at  
184 Brown University (RI, USA).

185

## 186 **MIP data analysis and estimating drug resistance prevalence**

187 Sequencing data processing and variant calling were performed using MIPtools (v0.19.12.13;  
188 <https://github.com/bailey-lab/MIPTools>). The prevalence for each drug resistance marker was  
189 calculated as  $p = x / n * 100$ , where  $p$  is the prevalence,  $x$  is the number of infections with mutant  
190 alleles, and  $n$  is the number of successfully genotyped infections, as previously described.<sup>12</sup> Mixed  
191 genotypes, i.e. a sample with a reference allele and an alternative allele in a given sample, were  
192 considered mutant regardless of the within-sample mutant allele frequency. Haplotypes were  
193 reconstructed for all samples using the major allele in a given codon (**Supplementary Methods**).

## 194 **Phenotype–genotype association analysis**

195 Isolates with >30% missing genotype data were discarded. We then retained only biallelic non-  
196 synonymous SNPs with minor allele frequency (MAF) >0.01 for phenotype-genotype association  
197 analysis. Phenotype-genotype association was performed with the SNPassoc R package (v.2.1.0)  
198 <sup>26</sup> using the built-in WGassociation function under a dominant model. For each drug, a linear  
199 regression model was fitted with continuous IC<sub>50</sub> values as the outcome and individual SNP  
200 genotypes as independent variables. The model was adjusted for the complexity of infection (COI),  
201 year, and the visited country of imported cases as covariates.

## 202 **Ethical aspects**

203 Informed consent was not required because the clinical and biological data were collected from  
204 the FNMRC database by the common public health mission of all National Reference Centers in  
205 France, in coordination with the Santé Publique France organization for malaria surveillance and  
206 care. According to article L1221–1.1 of the Public Health Code in France, the study was considered  
207 non-interventional research and only required the patient's non-opposition (according to article  
208 L1211–2 of the Public Health Code). All data were anonymized before use. The FNMRC got the  
209 authorization to use their databases according to the National Data Protection Commission (CNIL)  
210 (number 1223103). Human DNA was not analyzed.

## 211 **Role of the funding source**

212 The funders of the study had no role in design, data collection, data analysis, data interpretation,  
213 or writing of the report.



## 214 Results

### 215 Geographical origin and year of collection

216 From January 2016 to February 2023, 1,126 *P. falciparum* isolates from travelers were evaluated  
217 for *ex vivo* antimalarial drug susceptibility at the FNMRC laboratory. Of these, 813 isolates were  
218 included in this study, corresponding to samples with validated IC<sub>50</sub> for the following six drugs:  
219 DHA, LMF, MFQ, MDAQ, CQ, and PPQ. According to reported travel history, infections  
220 originated from thirty-five African countries, but most isolates were from travelers who had visited  
221 West (59%, 471/805) and Central (38%, 306/805; **Figure 1A**) African countries. The most visited  
222 countries were Côte d'Ivoire (27%, 217/805), Cameroon (21%, 169/805), Mali (9%, 69/805),  
223 Guinea (7%, 58/805), and Republic of the Congo (6%, 45/805) (**Figure 1A** and **Table S2**). The  
224 number of samples collected per year was higher in 2016 (165/805), 2017 (166/805) and 2018  
225 (167/805) than in 2019 (100/805) and beyond (**Figure 1B**). No differences were seen in the  
226 distribution of countries between 2016-2018 and 2019-2023 ( $p > 0.05$ , **Table S3**). Travelers were  
227 predominantly male (62%), with a median age of 40 years and a median parasitemia of 1.7%  
228 (**Table 1**).

### 229 Half-maximal inhibitory concentration (IC<sub>50</sub>) for six antimalarial compounds

230 IC<sub>50</sub> values of *P. falciparum* 3D7 laboratory reference strain are indicated in **Table S4**. For the  
231 isolates tested in this study, the median IC<sub>50</sub> estimated with the standard growth inhibition assay  
232 was less than 30 nM for all assessed antimalarial compounds, consistent with potent activity. The  
233 median IC<sub>50</sub> values for the six drugs were 1.1 nM [IQR: 0.8-1.7] for DHA, 16.7 nM [9.9-27.4]  
234 for LMF, 29.5 nM [19.1-45.5] for MFQ, 23.4 nM [17.1-39.0] for MDAQ, 26.7 nM [18.0-41.2]  
235 for CQ, and 18.5 nM [15.1-24.3] for PPQ. Using published resistance thresholds,<sup>22-24</sup> 49% of the  
236 isolates were classified as resistant to MFQ (IC<sub>50</sub> > 30 nM), 10% to CQ (IC<sub>50</sub> > 100 nM), and 3% to MDAQ  
237 (IC<sub>50</sub> > 80 nM). Less than 1% of isolates had an IC<sub>50</sub> above the threshold for DHA (10 nM), LMF (150 nM)  
238 and PPQ (135 nM) (**Figure S1**).

239 Remarkably, when compared to samples collected in 2016-2018, a significant decrease in  
240 susceptibility was observed in 2019-2023 samples for LMF (median IC<sub>50</sub>: 13.9 nM [IQR: 8.42-  
241 21.7] in 2016-2018 versus 23.0 nM [14.4-35.1] in 2019-2023;  $p < 0.001$ ), MDAQ (20.3 nM [15.4-  
242 33.1] versus 35.4 nM [21.2-51.1];  $p < 0.001$ ), and modestly for PPQ (18.0 nM [14.2-22.4] versus  
243 20.5 [16.5-26.2];  $p < 0.001$ ) (**Figure 2**, **Table S5**). In contrast, a modest improvement in

244 susceptibility was observed in 2019-2023 samples for CQ (27.7 nM [19.0-45.0] versus 25.1 nM  
245 [17.3-38.9];  $p=0.05$ ), and there was no significant change for MFQ. Altered drug susceptibilities  
246 between the two time periods were again detected after data stratification into West and Central  
247 African countries, except for DHA, which was significantly altered only in samples from Central  
248 Africa, and for CQ (**Table S6**), possibly because of less power for CQ. We note that these temporal  
249 changes in drug susceptibility were not significant when using 1-year bins during the 2016-2023  
250 study period (**Table S7**). The frequency of CQ-resistant isolates ( $IC_{50} > 100$  nM) decreased nearly  
251 by half in 2019-2023 compared to 2016-2018 (7% in 2019-2023 versus 12% in 2016-2018,  
252  $p<0.05$ ) (**Table S8**).

253 There were several significant drug-drug  $IC_{50}$  correlations, most of which were positive (**Figure**  
254 **S2**). The largest positive correlations involved the following drug pairs: LMF-MFQ, CQ-MDAQ,  
255 DHA-LMF, and DHA-MFQ. The negative correlations were much less intense and involved CQ-  
256 LMF and CQ-MFQ.

## 257 **Prevalence of validated antimalarial resistance mutations**

258 Sequence data generated with MIPs covered 43 exons from 14 genes reported to be associated  
259 with drug resistance. 805 out of the 813 included isolates were successfully genotyped. The  
260 average number of reads per sample was 120 (range: 48-258) (**Figure S3**). Nearly 60% of the  
261 isolates (477/805) had a COI  $>1$ . We first examined the prevalence of mutations in five robustly  
262 validated drug resistance genes: *pfdhfr* and *pfdhps* (associated with resistance to pyrimethamine  
263 and sulfadoxine, respectively), *pfert* and *pfmdr1* (associated with multidrug resistance), and  
264 *pfkelch13* (associated with ART-R).

265 More than 85% of isolates carried the *pfdhfr* N51I, C59R, and S108N mutations (**Figure 3A**),  
266 which were predominantly found as the IRN triple mutant haplotype and marginally as the ICN  
267 and NRN double mutants (**Figure S4**), regardless of the country of infection (**Figure S5, Table**  
268 **S9**). We found a low prevalence of the *pfdhps* I431V (8.5%), K540E (6%), A581G (8%) and  
269 A613S (15%) mutations, and a large prevalence of S436A and A437G (53% and 78%,  
270 respectively). At *pfdhps* codons 436-437-540-581 considered jointly (haplotypes, **Figure S4**),  
271 single mutants AAKA and SGKA were the most common haplotypes (35% and 50% respectively).  
272 The quintuple mutant *dhfr+dhps* haplotype IRN+A437G-K540E, which is responsible for SP  
273 treatment failure in adults and children, was detected in 3% of samples (19/600).

274 In *pfmdr1*, the prevalence of the N86Y, Y184F, D1246Y mutations were 11%, 71%, and 1%,  
275 respectively (**Fig 3A**), and the prevalence of the NYD, NFD and YFD haplotypes at codons 86-  
276 184-1246 were 38·8%, 54·8% and 5·6%, respectively (**Figure S4**). Other minor haplotypes were  
277 found in less than 1% of isolates.

278 The *pfprt* K76T mutation was found in 30% of isolates (**Figure 3A**) and was absent in the Central  
279 African Republic (**Figure S5**). Regarding the classical eight *pfprt* codons 74-75-76-220-271-326-  
280 356-371, three main haplotypes were detected (**Figure S4**; per country, see **Table S10** and **Figure**  
281 **S6**): the wild-type MNKAQNIR (77%) and the mutants **IETSENTI** (also known as Cam783;  
282 15%) and **IETSENI** (also known as GB4; 6%).

283 Four isolates carried a validated *pfkelch13* mutation in the propeller domain (**Figure 3B**): A675V  
284 (2/734, from Rwanda in 2019 and Uganda in 2020), Y493H (1/705, from Mali in 2016), and I543T  
285 (1/731, from Côte d'Ivoire in 2018). The two isolates carrying the A675V mutation showed a  
286 susceptibility to DHA ( $IC_{50} = 1\cdot78$  nM and  $IC_{50} = 1\cdot67$  nM) larger than the upper quartile. The  
287 A675V isolate from Rwanda also had elevated  $IC_{50}$  values for LMF ( $IC_{50} = 41\cdot57$  nM) and MFQ  
288 ( $IC_{50} = 49\cdot12$  nM). Two other mutations were detected in the propeller domain: A578S (8 isolates)  
289 that is known as a polymorphism and E612D (1 isolate). Most of the other non-synonymous  
290 *pfkelch13* mutations occurred in the N-terminal-coding domain (**Figure 3B**, **Figure S7**), K189T  
291 being very frequent (58·4%) and also known as polymorphism.

292 Finally, the prevalence of “background” mutations associated with ART-R in South East Asia <sup>27</sup>  
293 was low: *pfdd* D193Y at 0·27%, *pfmdr2* T484I at 0%, *pfpi7* C1484F at 0·16%, and *pfpp* V1157L  
294 at 0% (**Table S11**).

295 We then analysed mutation prevalence over time (**Figure 3C**, **Figures S8** and **S9**, and **Table S12**).  
296 Remarkably, when compared to samples collected in 2016-2018, a significant decrease in  
297 prevalence was observed in 2019-2023 samples for *pfprt* K76T (33% in 2016-2018 versus 25% in  
298 2019-2023;  $p < 0\cdot05$ ) and *pfmdr1* N86Y (14% versus 5%;  $p < 0\cdot001$ ), and there was a nearly  
299 significant decrease for *pfmdr1* Y184F (73% versus 66%;  $p = 0\cdot07$ ) (**Figure 3C**). The prevalence  
300 of the wild-type haplotype at *pfprt* 76 and *pfmdr1* 86 (K76-N86) was largely dominant across the  
301 whole study period and slightly increased from 73% in 2016-2018 to 79% in 2019-2023 ( $p = 0\cdot05$ ,  
302 **Figure 3D**, **Figure S8B**). Analysis of SNP-SNP correlation in isolates from Côte d'Ivoire and

303 Cameroon indicated that *pfmdr1* N86Y and *pfcr1* K76T were not in linkage disequilibrium with  
304 each other (**Figure S10**).

### 305 **Association between SNPs and drug susceptibility**

306 Genotype-phenotype association analysis across 362 SNPs and susceptibilities to 6 drugs showed  
307 several significant associations (**Figure 4, Tables S12** for the full list of associations, and **S13** and  
308 **S14** after correction for multiple testing). Most strikingly, multiple well-known SNPs in *pfcr1* were  
309 strongly associated with susceptibilities to multiple drugs (CQ, MDAQ, DHA, LMF) and were  
310 borderline significant after multiple testing correction for MFQ and PPQ. Mutant *pfcr1* alleles were  
311 associated with decreased susceptibility to CQ ( $p = 10^{-38}$ – $10^{-50}$  for 7 amino acids) and MDAQ  
312 ( $p = 10^{-6}$ – $10^{-8}$  for 7 amino acids) whereas wild-type *pfcr1* alleles were associated with decreased  
313 susceptibility to DHA ( $p = 10^{-6}$  for 6 amino acids) and LMF ( $p = 10^{-5}$  for 3 amino acids). There  
314 was also a strong association between the well-characterised mutation N86Y in *pfmdr1* and  
315 susceptibility to MFQ ( $p = 10^{-6}$ ), LMF ( $p = 10^{-5}$ ), and DHA ( $p = 0.0003$ , although non-significant  
316 after correction). Finally, the *pfubp1* N1704K and K1705N mutations were associated with  
317 decreased susceptibility to CQ ( $p = 2 \cdot 10^{-5}$  and  $0.0001$  respectively).

318 To control for the major *pfcr1* effect, we added *pfcr1* K76T as a covariate (**Table S13**). All the  
319 associations involving another SNP in *pfcr1* (except M74I for CQ) and *pfubp1* N1704K and  
320 K1705N were lost, suggesting they were dependent on the *pfcr1* K76T genotype. The associations  
321 involving *pfmdr1* (with LMF and MFQ) were maintained and no new associations were detected.  
322 A model with *pfmdr1* N86Y as a covariate abolished only the association of *pfubp1* K1705N for  
323 CQ (but not the one of N1704K) (**Table S13**). These data indicate that, among the 362 tested SNPs,  
324 *pfcr1* and *pfmdr1* SNPs were the major drivers of susceptibility to most tested drugs and could  
325 interact in a likely additive manner in the case of LMF.

### 326 **Effect of *pfcr1* and *pfmdr1* haplotypes on IC<sub>50</sub>s**

327 As compared to the wild-type *pfcr1* (MNKAQNIR), mutant haplotypes **IETSENTI** and **IETSENII**  
328 (that differ at I356T only) were significantly associated with decreased susceptibility to CQ and  
329 MDAQ (Kruskal-Wallis test, p-value range:  $<0.0001$ – $0.0003$ ; **Figure S11**) and improved  
330 susceptibility to DHA, LMF and PPQ (Kruskal-Wallis test, p-value range:  $<0.0001$ – $0.05$ ).  
331 **IETSENTI**, but not **IETSENII**, was associated with improved susceptibility to MFQ (Kruskal-  
332 Wallis test,  $p = 0.0001$ ), suggesting that I356T has some role in MFQ transport activity.

333 Isolates carrying the *pfmdr1* NYD wild-type haplotype had decreased susceptibility to DHA, LMF,  
334 MFQ and improved susceptibility to PPQ as compared to the mutant YFD (Kruskal-Wallis test,  
335 p-value range: <0.001 - 0.01; **Figure S11**).

336 Finally, the analysis of *pfprt* K76T - *pfmdr1* N86Y haplotypes identified three main drug patterns  
337 (**Figure 5**). The susceptibility to LMF, MFQ, and also marginally to DHA, improved with the  
338 number of *pfprt-pfmdr1* mutations suggesting these mutations work in additive ways. The most  
339 decreased susceptibility to LMF was associated with the wild-type haplotype (*pfprt* K76-*pfmdr1*  
340 N86). The susceptibility to CQ and MDAQ decreased mostly with mutant *pfprt*, and the addition  
341 of mutant *pfmdr1* had a lesser effect. The susceptibility to PPQ was more difficult to interpret with  
342 little haplotypic effects.

## 343 Discussion

344 Whereas there are recent reports of emerging ART-R and decreased susceptibility to LMF in *P.*  
345 *falciparum* parasites from East Africa,<sup>28</sup> few recent studies have investigated the resistance status  
346 of contemporary West and Central African isolates at a large scale. Here, we report the temporal  
347 trends of *ex vivo* susceptibilities to six antimalarials using standard growth inhibition assays and  
348 their association with mutations in fourteen drug resistance genes in 805 *P. falciparum* samples  
349 collected between 2016 and 2023 in returned travelers to West and Central African countries. We  
350 found an overall excellent susceptibility of isolates to the six evaluated antimalarials, but the one  
351 to ACT partner drugs LMF and MDAQ decreased in recent years. Concomitantly, the prevalence  
352 of wild-type *pfprt* K76 and *pfmdr1* N86 alleles increased in recent years, consistent with a large  
353 selective pressure exerted by the use of LMF and the discontinuation of CQ in these regions.  
354 Finally, altered susceptibility to most drugs was strongly associated with *pfprt* and/or *pfmdr1*  
355 genotypes.

356 Regarding molecular ART-R, only four isolates among 805 carried a WHO-validated *pfkelch13*  
357 mutation. A675V was detected in two travelers returning from East Africa (Rwanda and Uganda),  
358 consistent with the spread of this mutation in this region.<sup>10,29</sup> The returned traveler from Uganda  
359 showed delayed clearance under artesunate therapy,<sup>30</sup> whereas the A675V isolate from Rwanda,  
360 had elevated IC<sub>50</sub> values for LMF (41.57 nM) and MFQ (49.12 nM), consistent with clinical and  
361 *ex vivo* data reported by others for Ugandan A675V isolates.<sup>11,14,15</sup> Two other validated mutations,

362 Y493H and I543T, were identified in one isolate from Mali in 2016 and one from Côte d'Ivoire in  
363 2018, respectively. These isolates did not have unusual IC<sub>50</sub>s against any of the drugs tested. As  
364 these two mutations were not detected in more recent samples, these seem to be sporadic cases.  
365 Altogether, *pfkelch13* ART-R mutations were detected but uncommon in Central and West African  
366 isolates during the study period (2016-2023). Contrary to the current situation in East Africa,  
367 *pfkelch13*-mediated ART-R is seemingly not emerging during 2016-2023 in West and Central  
368 African regions. Continuous monitoring of *pfkelch13* mutations should however be reinforced as  
369 they could either emerge locally or be introduced in these regions by intracontinental migration  
370 from East Africa.

371 We found a significant reduction in susceptibility of *P. falciparum* to LMF and MDAQ for samples  
372 collected in recent years. LMF and MDAQ are the two main partner drugs used in West and Central  
373 Africa during the last decade. The use of ACTs may have selected parasites whose response to the  
374 partner's drug is altered in these regions. A similar trend was previously reported for LMF in  
375 northern Uganda,<sup>14</sup> which possibly predated the emergence of ART-R in this region.<sup>10</sup> The clinical  
376 effects of the decreased susceptibilities to LMF and MDAQ observed in our study are unknown,  
377 but the spread of ART-R may be facilitated in such phenotypic backgrounds.

378 Remarkably, wild-type *pfprt* and *pfmdr1* genes were individually associated with decreased  
379 susceptibility to LMF, consistent with previous *in vitro* and clinical findings.<sup>31,32,33</sup> Haplotypic  
380 association analysis further suggests that the two genes have cumulative effects, with the wild-  
381 type haplotype (*pfprt* K76-*pfmdr1* N86) exhibiting the largest decrease in susceptibility to LMF.  
382 The increasing prevalence in recent years of parasites carrying the wild-type allele at either gene  
383 or at both could, therefore, explain the LMF data. In contrast the double mutant haplotype (*pfprt*  
384 76T-*pfmdr1* 86Y) exhibited the largest decrease in susceptibility to MDAQ. Taken together, these  
385 findings support the rationale for implementing regimens with drug combinations that exert  
386 opposing selective pressures.<sup>34</sup> Of note, susceptibility to MDAQ decreased in recent years,  
387 whereas the prevalence of the *pfprt* K76T mutation decreased slightly. This is surprising as this  
388 mutation is strongly associated with decreased susceptibility to MDAQ in our dataset and other  
389 studies. We have no solid explanation for this result, but one possibility could be that other  
390 mediators of altered susceptibility to MDAQ exist and that our targeted MIP sequencing and  
391 association studies did not capture them.

392 Intriguingly, two novel *pfubp1* mutations, N1704K and K1705N, were associated with reduced  
393 susceptibility to CQ in our data set. The effect of these *pfubp1* mutations seems to depend on the  
394 *pfert* K76T genotype. However, as these two mutations have low prevalence (10.0 and 7.9%,  
395 respectively) and likely a modest effect, we have low statistical power to conduct a haplotypic  
396 analysis. Several studies reported an association of different *upb1* mutations with altered survival  
397 or susceptibility to DHA in mouse malaria or *P. falciparum*,<sup>35,14</sup> and recently to MFQ, LMF and  
398 PPQ in the *Plasmodium yoelii* mouse malaria model.<sup>36</sup> However, as the two new mutations are  
399 located in an N/K repeat protein region that is not part of the reported active site(s) of the enzyme,  
400 gene editing experiments are needed to formally address their role in modulating drug response to  
401 CQ.<sup>37</sup>

402 The high prevalence of pyrimethamine resistance mutations in the study period indicates the high  
403 level of SP pressure in West and Central Africa. Nevertheless, the low prevalence of *pfdhps* K540E  
404 (<10%) and of the SP-resistant quintuple *dhfr-dhps* mutant (3%) is reassuring that SP is still  
405 effective for preventive therapies. Indeed, the WHO recommends for countries to withdraw SP for  
406 IPTp use when the prevalence of *Pfdhps* K540E>95% and A581G>10% and for IPTi use when  
407 the prevalence of *Pfdhps* K540E >50%.<sup>38</sup>

408 This study was not conducted without limitations. First, we have not evaluated *ex vivo* resistance  
409 to artemisinin derivatives with the dedicated ring survival assay, the standard measure of in vitro  
410 susceptibility to artemisinins. We, however, report very rare ART-R mutations in *pfkelch13*, and  
411 at this time, these are the major determinants of ART-R in patients. Second, we have not evaluated  
412 copy number variations in *pfmdr1* and *pfplasmepsins 1-2* that are associated with altered  
413 susceptibility to MFQ and PPQ, respectively. Third, our geographical coverage of West and  
414 Central Africa is biased, with two countries contributing to almost 50% of the total isolate sampling  
415 (169 isolates from Cameroon in Central Africa and 217 isolates from Côte d'Ivoire in West Africa).  
416 Therefore, trends at the country level could not be robustly drawn. Fourth, our analyses focused  
417 on imported malaria cases to France and infections in travelers may differ in several aspects from  
418 those in people living in endemic areas. Finally, we used a targeted sequencing approach to  
419 genotype isolates and focused on validated and some candidate drug resistance genes. Detecting  
420 emerging resistance mutations in novel genes would need a larger genomic coverage.

421 In conclusion, our study provides much-needed information on molecular and phenotypic  
422 resistance in contemporary isolates from West and Central Africa. It shows how current and past  
423 control efforts have been affecting malaria parasite populations in those regions and calls for  
424 intensifying the monitoring to inform as quickly as possible on future changes regarding  
425 antimalarial drug susceptibilities and resistance.

## 426 Author contributions

427 JR, AAF, SC, VS, RCo, JC, JAB, and SH designed the study. SC, VS, RZ, AB, LC, and LH did  
428 the *ex-vivo* IC<sub>50</sub> assays, and archived data. LM, MT, BP, JC and SH provided administrative and  
429 logistical support. JR, AAF, JC, RCr, and JAB analysed and did the genotyping. JR and AAF  
430 verified and analysed the data and did the statistical analysis. All authors had full access to all the  
431 data. All authors contributed to the writing of the manuscript.

## 432 Acknowledgements

433 We thank the participants who anonymously agreed to participate in a malaria drug resistance  
434 surveillance study in France, the staff at the CNR for their support in collecting isolates and  
435 executing the drug resistance test, Justine Bailly at MERIT unit, and Alec Leonetti's MIP  
436 sequencing support at Brown University. The members of the French National Reference Centre  
437 for Imported Malaria Study Group are as follows: Dr A. Aboubacar (CHU Strasbourg), Dr P.  
438 Agnamey (CHU Amiens), Dr A. Ahmed (CHU Strasbourg), Dr D. Ajzenberg (CHU Limoges), Dr  
439 A. Angoulvant (CHU Bicetre), Dr F. Ariey (CHU Cochin, Paris), Dr B. Aubry (CH Le Mans), Pr  
440 F. Banisadr (CHU Reims), Dr S. Belaz (CHU Pontchaillou Rennes), Dr G. Belkadi (CHU Saint  
441 Antoine, Paris), Dr A. Bellanger (CHU Jean Minjoz,-Besancon), Dr D. Bemba (CHU Jean Verdier,  
442 Bondy), Dr F. Benaoudia (CH Troyes), Dr J. Benjamin Murat (CH Roanne), Dr M. Bloch (CHU  
443 Louis Mourier, Colombes), Dr F. Botterel (CHU Henri Mondor, Créteil), Dr V. Bouden (CH Saint-  
444 Nazaire), Dr M. Bougnoux (CHU Necker Enfants Malades, Paris), Dr C. Brump (CHU  
445 Lariboisière, Paris), Dr S. Brun (CHU Avicenne, Bobigny), Dr J. Brunet (CHU Strasbourg), Dr B.  
446 Buret (CH Niort), Dr P. Caraux-Paz (CH Villeneuve St Georges), Dr N. Celine (CHU Clermont  
447 Ferrand), Dr A. Cherif Touil (CH Niort), Dr S. Clauser (CHU Ambroise Paré, Boulogne  
448 Billancourt), Dr E. Collin (CH R Ballanger, Aulnay sous-bois), Dr N. Dahane (CHU Cochin,  
449 Paris), Dr C. Damiani (CHU Amiens), Dr E. Dannaoui (CHU HEGP, Paris), Dr C. Dard (CHU  
450 Grenoble), Pr M. Darde (CHU Limoges), Dr L. De Gentile (CHU Angers), Dr A. Debourgogne  
451 (CHU Nancy), Dr T. Delacour (CH Creil), Dr J. Delarbre (CH Mulhouse), Dr A. Delaval (CH R  
452 Ballanger, Aulnay sous-bois), Dr V. Delcey (CHU Lariboisière, Paris), Dr A. Deleplancque (CHU  
453 Lille), Dr G. Desoubeaux (CHU Bretonneau, Tours), Dr G. Desoubeaux (CHU Tours), Dr N.  
454 Desuremain (CHU Armand Trousseau, Paris), Dr G. Dewulf (CH Valenciennes), Dr R. Durand  
455 (CHU Avicenne, Bobigny), Dr M. Durieux (CHU Limoges), Dr E. Dutoit (CHU Lille), Dr M.



456 Edith (CH Valenciennes), Dr O. Eloy (CH André Mignot, Le Chesnay), Dr M. Evrard Sylvie (CH  
457 Villeneuve St Georges), Dr J. Faucher (CHU Limoges), Pr L. Favennec (CHU Ch,Pr A. Faye  
458 (CHU Robert Debre, Paris), Dr O. Fenneteau (CHU Robert Debre, Paris), Dr C. Ficko (Hia Begin,  
459 Saint-Mandé), Dr E. Frealle (CHU Lille), Dr R. Gabrielle (CH Tourcoing), Dr G. Gargala (CHU  
460 Rouen), Dr C. Garnaud (CHU Grenoble), Dr N. Godineau (CH Delafontaine, Saint-Denis), Dr J.  
461 Gorlicki (CHU Lariboisière, Paris), Dr A. Gravet (CH Mulhouse), Dr N. Guennouni (CHU Bicetre,  
462 Le Kremlin Bicêtre), Dr S. Hamane (CHU Saint-Louis, Paris), Dr T. Hanslik (CHU Ambroise  
463 Paré, Boulogne Billancourt), Dr A. Huguenin (CHU Reims), Dr J. Hurst (CH Jacques Monod, Le  
464 Havre), N. Imbert (APHP, Hôpital Bichat-Claude-Bernard), Dr F. Jeddi (CHU Nantes), Dr L.  
465 Jordan (CHU Lille), Dr L. Landraud (CHU Louis Mourier, Colombes), Dr H. Lapillonne (CHU  
466 Armand Trousseau, Paris), Dr S. Larréché (Hia Begin, Saint-Mandé), Dr R. Lavergne (CHU  
467 Nantes), Dr Y. Le Govic (CHU Angers), Dr G. Le Moal (CHU Poitiers), Dr J. Lemoine (CHU  
468 Angers), Dr C. Leprince (CH R Ballanger, Aulnay sous-bois), Dr E. Lesteven (CHU Lariboisière,  
469 Paris), Dr A. Li (CH Creil), Dr C. Lohmann (CH Mulhouse), Dr B. Louise (CHU Dijon), Dr M.  
470 Machouart (CHU Nancy), Dr C. Malassigne (CH Le Havre), C. Maréchal (APHP, Hôpital Bichat-  
471 Claude-Bernard), Dr A. Marteau (CHU Avicenne, Bobigny), Dr D. Maubon (CHU Grenoble), Dr  
472 E. Mazars (CH Valenciennes), Pr B. Megarbane (CHU Lariboisière, Paris), Dr A. Mendes-Moreira  
473 (CH La Rochelle), Dr S. Mermond (GH La Rochelle), C. Moissant, (APHP, Hôpital Bichat-  
474 Claude-Bernard), Dr A. Moreno (CHU Saint Antoine, Paris), Dr P. Mornand (CHU Armand  
475 Trousseau, Paris), Dr J. Murat (CHU Limoges), Dr R. Nabias (CH Poissy/Saint-Germain-En-  
476 Laye), Dr J. Naudin (CHU Robert Debre, Paris), Dr G. Nevez (CHU Brest), Pr G. Nevez (CHU  
477 La Cavale Blanche, Brest), Dr C. Nourrisson (CHU Clermont-Ferrand), Dr M. Oussama (CHU  
478 Pitié Salpêtrière, Paris), Dr N. Dr P. Patoz (CH Tourcoing), Pean-De-Ponfilly (CHU Lariboisière,  
479 Paris), Dr J. Peltier (CH Poissy/Saint-Germain-En-Laye), Dr P. Penn (CH Le Mans), Dr A.  
480 Perignon (CHU Pitié Salpêtrière, Paris), Dr E. Perraud-Cateau (CHU Poitiers), Dr A. Pfaff (CHU  
481 Strasbourg), Dr M. Pihet (CHU Angers), Dr P. Poirier (CHU Clermont Ferrand), Dr J. Pilo (Hia  
482 Begin, Saint-Mandé), Dr I. Poilane (CHU Jean Verdier, Bondy), Dr D. Poisson (CH Orléans), Dr  
483 D. Pons (CHU Clermont Ferrand), Dr L. Pull (CHU Robert Debre, Paris), Dr D. Quinio (CHU  
484 Brest), Dr D. Raffenot (CH Chambéry), Dr M. Revest (CHU Pontchaillou, Rennes), Dr G. Robert  
485 (CHU Grenoble), Dr O. Rogeaux (CH Chambéry), Dr M. Sasso (CHU Caremeau Nimes), Dr F.  
486 Schmitt (CH Mulhouse), Dr B. Sendid (CHU Lille), Dr Y. Senghor (Groupe Hospitalier Saint  
487 Joseph, Paris), Dr M. Silva (CH Jacques Monod, Le Havre), Dr J. Siriez (CHU Robert Debré,  
488 Paris), Dr E. Sitterlé (CHU Necker Enfants Malades, Paris), Dr F. Sorge (CHU Necker Enfants  
489 Malades, Paris), Dr I. Tantaoui (CHU Pitie-Salpêtriere, Paris), G. Thaboulet (APHP, Hôpital  
490 Bichat-Claude-Bernard), Dr D. Toubas (CHU Reims), Dr C. Tournus (CH Saint-Denis), L. Wallus,  
491 (APHP, Hôpital Bichat-Claude-Bernard), Dr H. Yera (CHU Cochin, Paris).

## 492 Conflict of interest

493 The authors declare no conflicts of interest.

## 494 Data availability

495 All sequencing data are available under accession no. SAMN42141774 to SAMN42142576 at the  
496 Sequence Read Archive (SRA), and the associated BioProject ID is PRJNA1129163. De-identified  
497 datasets generated during the current study and used to make all figures are available as  
498 supplementary files or tables. The data and R scripts developed in this study were deposited in the  
499 GitHub repository ([https://github.com/jrosados/CNR\\_IC50\\_MIPs](https://github.com/jrosados/CNR_IC50_MIPs)). Additional software packages  
500 and tools that are useful when working with MIP data are available at [https://github.com/bailey-](https://github.com/bailey-lab/MIPTools)  
501 [lab/MIPTools](https://github.com/bailey-lab/MIPTools) and <https://github.com/Mrc-ide/mipalyzer>.

## 502 References

- 503 1 Ménard D, Khim N, Beghain J, *et al.* A Worldwide Map of *Plasmodium falciparum* K13-  
504 Propeller Polymorphisms. *N Engl J Med* 2016; **374**: 2453–64.
- 505 2 Rosenthal PJ, Asua V, Conrad MD. Emergence, transmission dynamics and mechanisms  
506 of artemisinin partial resistance in malaria parasites in Africa. *Nat Rev Microbiol* 2024;  
507 published online Feb 6. DOI:10.1038/s41579-024-01008-2.
- 508 3 Conrad MD, Rosenthal PJ. Antimalarial drug resistance in Africa: the calm before the  
509 storm? *Lancet Infect Dis* 2019; **19**: e338–51.
- 510 4 Watson OJ, Gao B, Nguyen TD, *et al.* Pre-existing partner-drug resistance to artemisinin  
511 combination therapies facilitates the emergence and spread of artemisinin resistance: a  
512 consensus modelling study. *Lancet Microbe* 2022; **3**: e701–10.
- 513 5 Phyto AP, Nkhoma S, Stepniewska K, *et al.* Emergence of artemisinin-resistant malaria on  
514 the western border of Thailand: a longitudinal study. *Lancet* 2012; **379**: 1960–6.
- 515 6 Noedl H, Se Y, Schaefer K, *et al.* Evidence of artemisinin-resistant malaria in western  
516 Cambodia. *N Engl J Med* 2008; **359**: 2619–20.
- 517 7 Amaratunga C, Lim P, Suon S, *et al.* Dihydroartemisinin-piperaquine resistance in  
518 *Plasmodium falciparum* malaria in Cambodia: a multisite prospective cohort study. *Lancet*  
519 *Infect Dis* 2016; **16**: 357–65.
- 520 8 Leang R, Taylor WRJ, Bouth DM, *et al.* Evidence of *Plasmodium falciparum* Malaria  
521 Multidrug Resistance to Artemisinin and Piperaquine in Western Cambodia:  
522 Dihydroartemisinin-Piperaquine Open-Label Multicenter Clinical Assessment. *Antimicrob*  
523 *Agents Chemother* 2015; **59**: 4719–26.
- 524 9 Uwimana A, Legrand E, Stokes BH, *et al.* Emergence and clonal expansion of in vitro  
525 artemisinin-resistant *Plasmodium falciparum* kelch13 R561H mutant parasites in Rwanda.  
526 *Nat Med* 2020; **26**: 1602–8.
- 527 10 Conrad MD, Asua V, Garg S, *et al.* Evolution of partial resistance to artemisinins in malaria

- 528 parasites in Uganda. *N Engl J Med* 2023; **389**: 722–32.
- 529 11 Balikagala B, Fukuda N, Ikeda M, *et al.* Evidence of Artemisinin-Resistant Malaria in Africa.  
530 *N Engl J Med* 2021; **385**: 1163–71.
- 531 12 Fola AA, Feleke SM, Mohammed H, *et al.* *Plasmodium falciparum* resistant to artemisinin  
532 and diagnostics have emerged in Ethiopia. *Nat Microbiol* 2023; **8**: 1911–9.
- 533 13 Mihreteab S, Platon L, Berhane A, *et al.* Increasing Prevalence of Artemisinin-Resistant  
534 HRP2-Negative Malaria in Eritrea. *N Engl J Med* 2023; **389**: 1191–202.
- 535 14 Tumwebaze PK, Conrad MD, Okitwi M, *et al.* Decreased susceptibility of *Plasmodium*  
536 *falciparum* to both dihydroartemisinin and lumefantrine in northern Uganda. *Nat Commun*  
537 2022; **13**: 1–12.
- 538 15 van Schalkwyk DA, Pratt S, Nolder D, *et al.* Treatment Failure in a UK Malaria Patient  
539 Harboring Genetically Variant *Plasmodium falciparum* From Uganda With Reduced In Vitro  
540 Susceptibility to Artemisinin and Lumefantrine. *Clin Infect Dis* 2024; **78**: 445–52.
- 541 16 Marwa K, Kapesa A, Baraka V, *et al.* Therapeutic efficacy of artemether-lumefantrine,  
542 artesunate-amodiaquine and dihydroartemisinin-piperaquine in the treatment of  
543 uncomplicated *Plasmodium falciparum* malaria in Sub-Saharan Africa: A systematic review  
544 and meta-analysis. *PLoS One* 2022; **17**: e0264339.
- 545 17 Ishengoma DS, Mandara CI, Bakari C, *et al.* Evidence of artemisinin partial resistance in  
546 North-western Tanzania: clinical and drug resistance markers study. bioRxiv. 2024;  
547 published online Feb 1. DOI:10.1101/2024.01.31.24301954.
- 548 18 Mbye H, Mane K, Diop MF, *et al.* *Plasmodium falciparum* merozoite invasion ligands, linked  
549 antimalarial resistance loci and ex vivo responses to antimalarials in The Gambia. *J*  
550 *Antimicrob Chemother* 2022; **77**: 2946–55.
- 551 19 Somé AF, Conrad MD, Kabré Z, *et al.* Ex vivo drug susceptibility and resistance mediating  
552 genetic polymorphisms of *Plasmodium falciparum* in Bobo-Dioulasso, Burkina Faso.  
553 *Antimicrob Agents Chemother* 2024; **68**: e0153423.
- 554 20 Ndwiga L, Kimenyi KM, Wamae K, *et al.* A review of the frequencies of *Plasmodium*  
555 *falciparum* Kelch 13 artemisinin resistance mutations in Africa. *Int J Parasitol Drugs Drug*  
556 *Resist* 2021; **16**: 155–61.
- 557 21 Kaddouri H, Nakache S, Houzé S, Mentré F, Le Bras J. Assessment of the drug  
558 susceptibility of *Plasmodium falciparum* clinical isolates from africa by using a Plasmodium  
559 lactate dehydrogenase immunodetection assay and an inhibitory maximum effect model for  
560 precise measurement of the 50-percent inhibitory concentration. *Antimicrob Agents*  
561 *Chemother* 2006; **50**: 3343–9.
- 562 22 Pascual A, Madamet M, Briolant S, *et al.* Multinormal in vitro distribution of *Plasmodium*  
563 *falciparum* susceptibility to piperaquine and pyronaridine. *Malar J* 2015; **14**: 49.
- 564 23 Kaddouri H, Djimdé A, Dama S, *et al.* Baseline in vitro efficacy of ACT component drugs on  
565 *Plasmodium falciparum* clinical isolates from Mali. *Int J Parasitol* 2008; **38**: 791–8.
- 566 24 Pradines B, Tall A, Rogier C, *et al.* In vitro activities of ferrochloroquine against 55

- 567 Senegalese isolates of *Plasmodium falciparum* in comparison with those of standard  
568 antimalarial drugs. *Trop Med Int Health* 2002; **7**: 265–70.
- 569 25 Aydemir O, Janko M, Hathaway NJ, *et al.* Drug-Resistance and Population Structure of  
570 *Plasmodium falciparum* Across the Democratic Republic of Congo Using High-Throughput  
571 Molecular Inversion Probes. *J Infect Dis* 2018; **218**: 946–55.
- 572 26 González JR, Armengol L, Solé X, *et al.* SNPAssoc: an R package to perform whole  
573 genome association studies. *Bioinformatics* 2007; **23**: 644–5.
- 574 27 Miotto O, Amato R, Ashley EA, *et al.* Genetic architecture of artemisinin-resistant  
575 *Plasmodium falciparum*. *Nat Genet* 2015; **47**: 226–34.
- 576 28 Rosenthal PJ, Asua V, Bailey JA, *et al.* The emergence of artemisinin partial resistance in  
577 Africa: how do we respond? *Lancet Infect Dis* 2024; published online March 26.  
578 DOI:10.1016/S1473-3099(24)00141-5.
- 579 29 van Loon W, Oliveira R, Bergmann C, *et al.* In Vitro Confirmation of Artemisinin Resistance  
580 in *Plasmodium falciparum* from Patient Isolates, Southern Rwanda, 2019. *Emerg Infect Dis*  
581 2022; **28**: 852–5.
- 582 30 Coppée R, Bailly J, Sarrasin V, *et al.* Circulation of an Artemisinin-Resistant Malaria  
583 Lineage in a Traveler Returning from East Africa to France. *Clin Infect Dis* 2022; **75**: 1242–  
584 4.
- 585 31 Dhingra Satish K., Gabryszewski Stanislaw J., Small-Saunders Jennifer L., *et al.* Global  
586 Spread of Mutant PfCRT and Its Pleiotropic Impact on *Plasmodium falciparum* Multidrug  
587 Resistance and Fitness. *MBio* 2019; **10**: 10.1128/mbio.02731–18.
- 588 32 Sisowath C, Petersen I, Veiga MI, *et al.* In Vivo Selection of *Plasmodium falciparum*  
589 Parasites Carrying the Chloroquine-Susceptible pfcr1 K76 Allele after Treatment with  
590 Artemether-Lumefantrine in Africa. *J Infect Dis* 2009; **199**: 750–7.
- 591 33 Windle ST, Lane KD, Gadalla NB, *et al.* Evidence for linkage of pfmdr1, pfcr1, and pfk13  
592 polymorphisms to lumefantrine and mefloquine susceptibilities in a *Plasmodium falciparum*  
593 cross. *Int J Parasitol Drugs Drug Resist* 2020; **14**: 208–17.
- 594 34 van der Pluijm RW, Tripura R, Hoglund RM, *et al.* Triple artemisinin-based combination  
595 therapies versus artemisinin-based combination therapies for uncomplicated *Plasmodium*  
596 *falciparum* malaria: a multicentre, open-label, randomised clinical trial. *Lancet* 2020; **395**:  
597 1345–60.
- 598 35 Borrmann S, Straimer J, Mwai L, *et al.* Genome-wide screen identifies new candidate  
599 genes associated with artemisinin susceptibility in *Plasmodium falciparum* in Kenya. *Sci*  
600 *Rep* 2013; **3**: 1–10.
- 601 36 Xu R, Lin L, Jiao Z, *et al.* Deaggregation of mutant *Plasmodium yoelii* de-ubiquitinase UBP1  
602 alters MDR1 localization to confer multidrug resistance. *Nat Commun* 2024; **15**: 1774.
- 603 37 Singh BK, Zhang C, Wu J, *et al.* A *Plasmodium falciparum* RING Finger E3 Ubiquitin Ligase  
604 Modifies the Roles of PfMDR1 and PfCRT in Parasite Drug Responses. *Antimicrob Agents*  
605 *Chemother* 2023; **67**: e0082122.

606 38 Okell LC, Griffin JT, Roper C. Mapping sulphadoxine-pyrimethamine-resistant *Plasmodium*  
607 *falciparum* malaria in infected humans and in parasite populations in Africa. *Sci Rep* 2017;  
608 7: 7389.

609  
610  
611  
612  
613  
614  
615  
616  
617  
618  
619  
620  
621  
622  
623  
624  
625  
626  
627  
628  
629  
630  
631  
632  
633  
634  
635  
636  
637  
638  
639

640

**Table 1.** Epidemiological characteristics of travelers returning to France and description of isolates from 2016 - 2023

| <b>Participant characteristics</b>                 | <b>n = 805</b>     |
|----------------------------------------------------|--------------------|
| Age, median [IQR]                                  | 39.2 [27.1, 51.40] |
| Sex, n (%)                                         |                    |
| Female                                             | 306 (38.0%)        |
| Male                                               | 499 (62.0%)        |
| <b>Isolates characteristics</b>                    |                    |
| Parasitemia* % (Parasites / 100 RBC), median [IQR] | 1.70 [0.81, 3.46]  |

IQR: Interquartil range; RBC: Red blood cells. \* Missing data for two isolates.

641

642

643

644

645

646

647

648

649

650

651

652

653

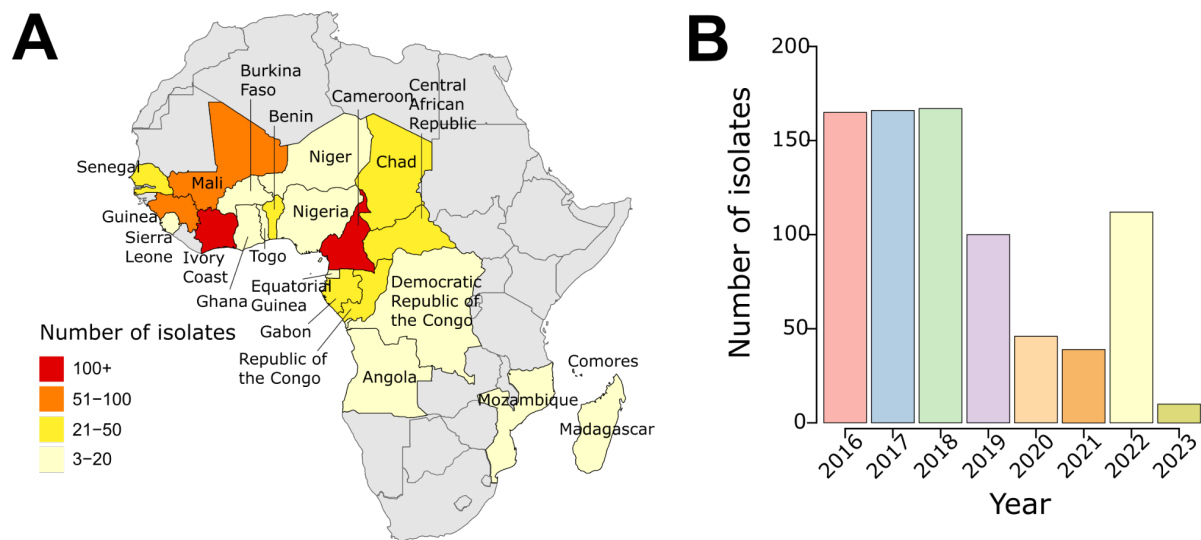

654

655 **Figure 1. Geographical origin and collection year of isolates. A)** Map of Africa showing the origin of malaria  
656 cases imported into France. Colors indicate sample size, and countries with fewer than three isolates are not shown.

657 **B)** Bar plot showing the temporal distribution of imported malaria cases included in this study.

658

659

660

661

662

663

664

665

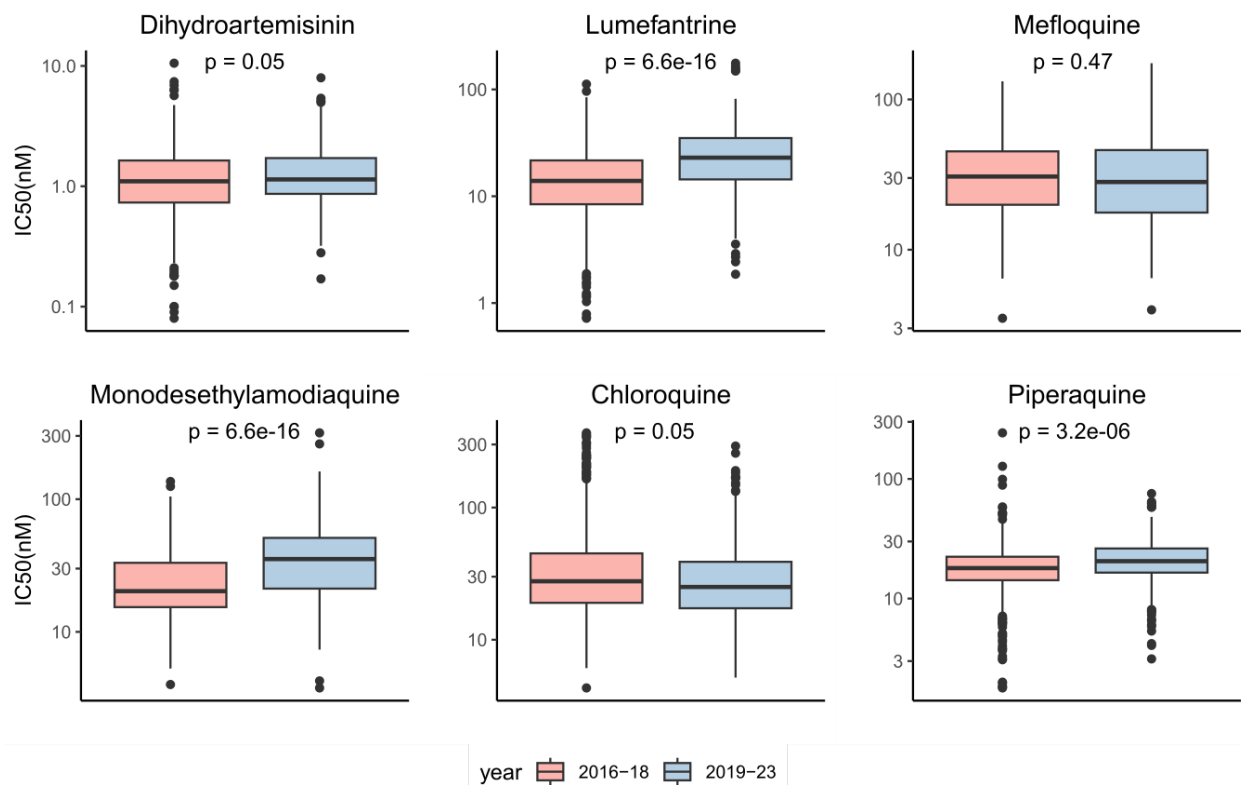

666  
667 **Figure 2. Half-maximal inhibitory concentration (IC<sub>50</sub>) for six antimalarial drugs. A)** Distribution of IC<sub>50</sub> for the  
668 six antimalarial drugs in 2016-18 and 2019-23. Box plots show the median IC<sub>50</sub> (in nM) and interquartile range.  
669 Change in susceptibility over time was tested by Mann-Whitney test. P-values were adjusted using Benjamini-  
670 Hochberg correction.

671



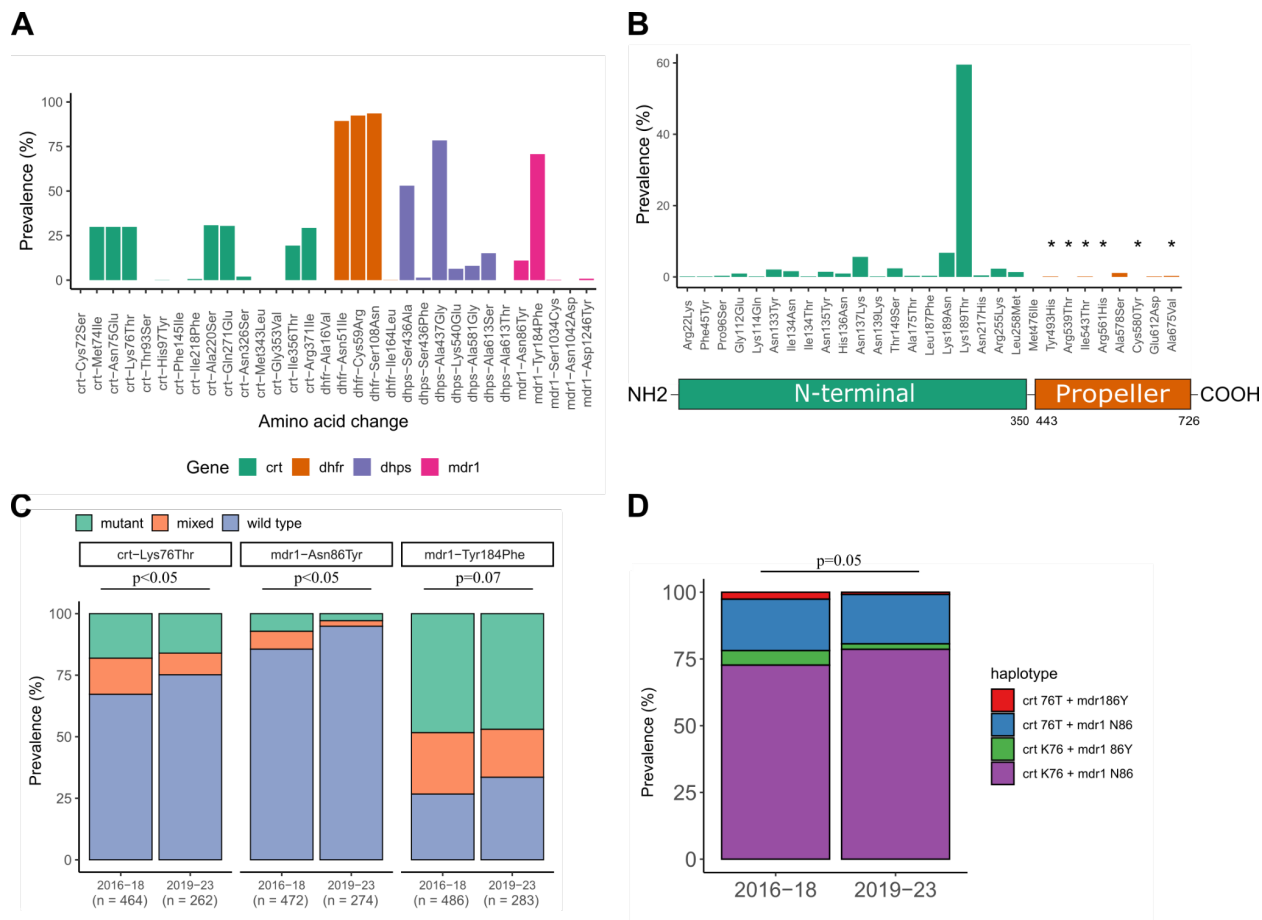

672  
 673 **Figure 3. Prevalence of key mutations associated with resistance to different drugs.** A) Prevalence of key  
 674 mutations in *pfprt*, *pfdhfr*, *pfdhps* and *pfmdr1* genes detected in isolates from this study. B) Prevalence of mutations  
 675 in the *pfkelch13* gene. Green bar plots indicate the prevalence of mutations in the N-terminal-coding domain, while  
 676 orange bar plots indicate the prevalence of mutations in the propeller domain. SNPs marked with an asterisk (\*) are  
 677 validated or candidate SNPs by WHO. C) Prevalence of the main key mutations in *pfprt* and *pfmdr1* over time. D)  
 678 Prevalence of *pfprt* 76-*pfmdr1* 86 haplotypes over time. Color code for the 4 haplotypes: purple, wild-type K76-  
 679 N86; green, single mutant K76-86Y; blue, single mutant 76T-N86; red, double mutant 76T-86Y. P-values were  
 680 calculated by Fisher's exact test.

681

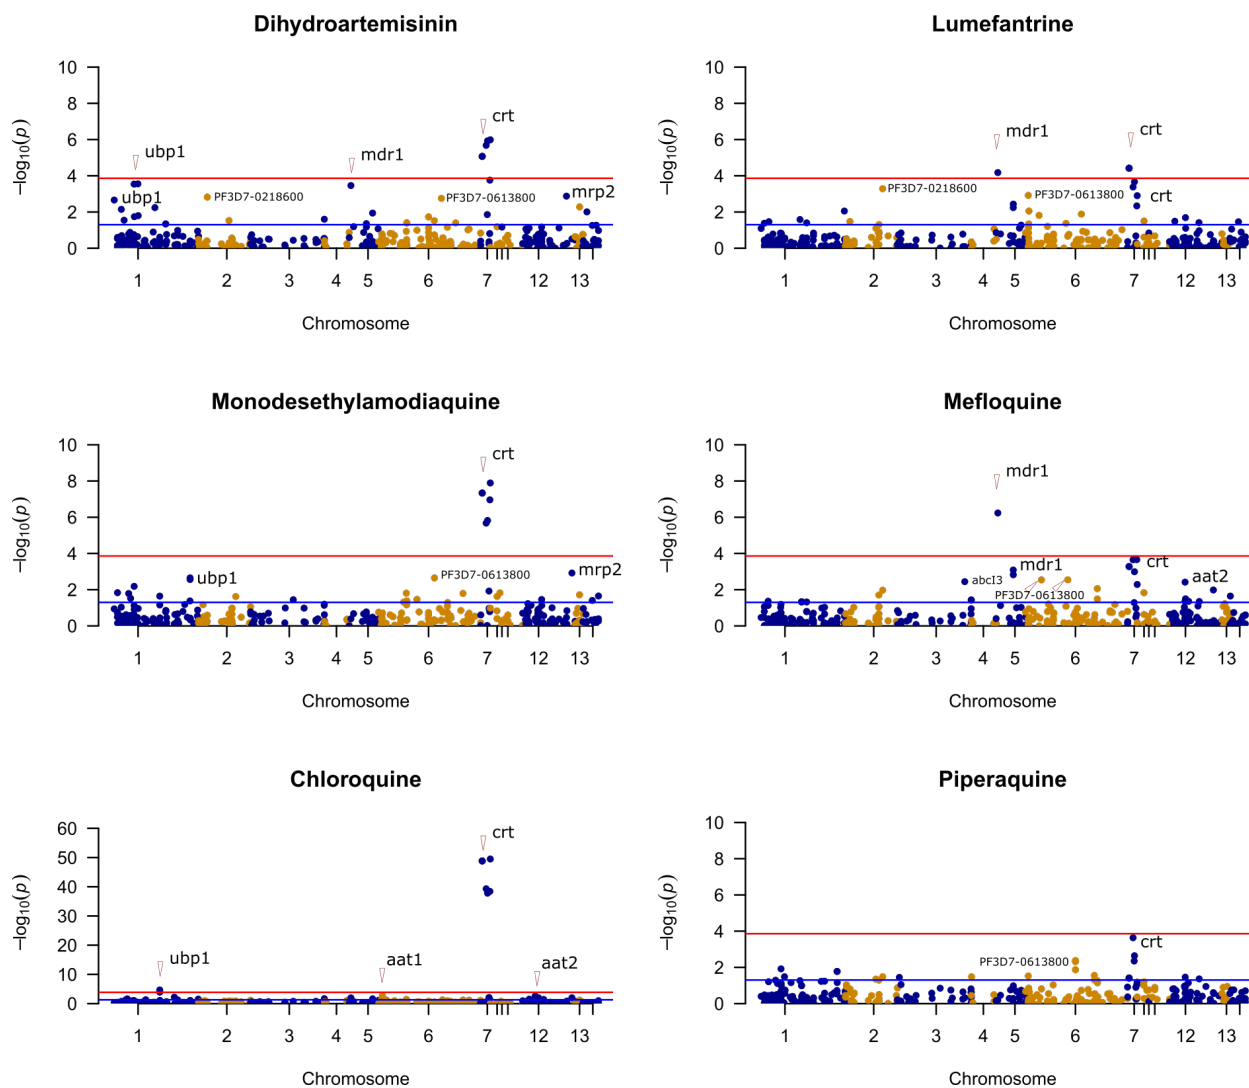

682

683 **Figure 4. Manhattan plot showing the significance of SNPs associated with six antimalarial drugs.** Each dot  
684 represents 1 of 362 SNPs with  $MAF > 0.01$  colored by chromosome. The x-axis represents the chromosomal location  
685 of the SNPs, and the y-axis represents the  $-\log_{10}$  of the P-value obtained from the linear regression model analysis.  
686 The blue line represents the nominal P-value ( $P \leq 0.05$ ), and the red line represents the P-value after Bonferroni  
687 correction ( $P \leq 1 \times 10^{-4}$ ). The full list of SNPs associated with IC<sub>50</sub> is shown in **Table S13**.

688

689

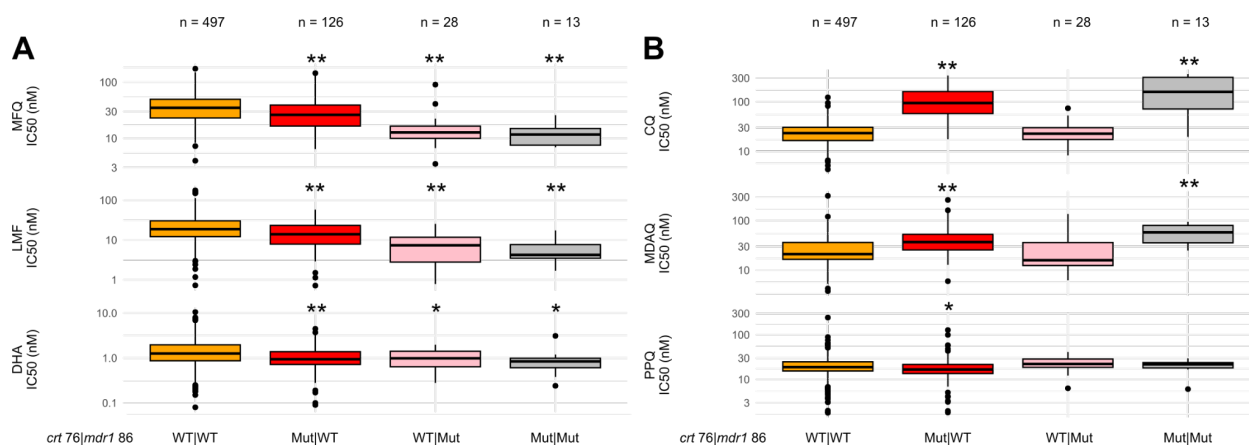

690 **Figure 5. Effect of *pfprt* 76-*pfmdr1* 86 haplotypes on IC<sub>50</sub> for six drugs.** A) IC<sub>50</sub> for mefloquine (MFQ),  
691 lumefantrine (LMF) and dihydroartemisinin (DHA) disaggregated by *pfprt*-*pfmdr1* haplotypes. B) IC<sub>50</sub> for  
692 chloroquine (CQ), monodesethylamodiaquine (MDAQ) and piperazine (PPQ) disaggregated by *pfprt*-*pfmdr1*  
693 haplotypes. Haplotypes were built with *pfprt* K76T and *pfmdr1* N86Y using the major allele per position. n: number  
694 of isolates carrying the haplotype. Differences in the IC<sub>50</sub> of wild-type (WT|WT, crt-K76|mdr1-N86) versus single  
695 mutants (Mut|WT, crt-76T|mdr1-N86), (WT|Mut, crt-K76|mdr1-86Y), and double mutant (Mut|Mut, crt-76T|mdr1-  
696 86Y) were calculated with a Pairwise Wilcoxon tests with Benjamini-Hochberg correction. \*: p<0.05; \*\*: p<0.001.
